# Supplementary material for: Does Conformation Affect the Analytical Response? A Structural and Infrared Spectral Evaluation of Phenethylamines (2C-H, 25H-NBOH, and 25I-NBOMe) Using In Silico Methodology
Source: MDPI journal article supplement (doi:10.3390/psychoactives3010006), 2024-02-25
Supplement: s1 [file s1]

## Supplementary Material

### Summary index

|                                                                                 |          |
|---------------------------------------------------------------------------------|----------|
| <b>Background.....</b>                                                          | <b>2</b> |
| Table S1. 2C-H: crystal conformation, xyz coordinates and conformers.....       | 3        |
| Table S2. 25H-NBOH: crystal conformation, xyz coordinates and conformers .....  | 4        |
| Table S3. 25I-NBOMe: crystal conformation, xyz coordinates and conformers ..... | 7        |

## Background

According to the quantum chemistry code, the keywords used must be the most appropriate to address the numerical precision of the calculation. The keywords used according to ORCA recommendations were:

- (a) The functionals employed were B3LYP and PBE0. B3LYP is a hybrid functional in which the non-localized Hartree-Fock approach is mixed with the energy functional from the generalized gradient approximation (20% Hartree-Fock exchange). The Perdew-Wang gradient-corrected correlation energy (used in Becke's work), is exchanged for the Lee-Yang-Parr correlation energy [24]. The PBE0 is a hybrid version of the PBE functional with one parameter: a predefined exact exchange amount [27].
- (b) Energies and geometries generally converge at the DFT level when using a balanced polarized triple-zeta basis set. With ORCA 5.0, the DHF-TZVP base was used, derived from the Def2-TZVP bases with minor modifications for elements 5s, 6s, 4d and 5d and iodine [27].
- (c) The auxiliary basis used was Def2/J, as it is a universal Coulomb adjustment basis and is suitable for all basis sets of the def2 type [27].
- (d) The RIJCOSX keyword was used to speed up DFT optimizations. The RI-J keyword is used for Coulomb integrals and COSX numerical integration is used for HF switching [49].
- (e) The DFT Integration Grid was DefGrid3, to control the overall accuracy of the DFT grid. The number 3 (maximum) used makes it the highest quality grid and is close to the limit if we consider a huge grid as a reference [27,49]. The NOFINALGRIDX keyword was also used, turning off the final grid in COSX (the algorithm of chain of spheres to handle quantum mechanical exchange) [27].
- (f) For geometry optimizations, we use standard SCF (Self Consistent Field) convergence like TightSCF to reduce noise in gradients [27].
- (g) To obtain a fully optimized geometry (gradient even closer to zero than the standards) the TightOPT keyword was used [27].
- (h) Since DFTs do not include dispersion forces, the B3DJ correction (Atom-pairwise dispersion correction to the DFT energy with Becke-Johnson damping) was employed to account for most of this contribution to the energy [27].
- (i) The keyword used for the vibrational frequencies to be generated was FREQ [49].

**Table S1.** 2C-H: crystal conformation, xyz coordinates and conformers.

| 2C-H                                                                                                                                                                                                                                                                                                                                              |          |          |          |  |
|---------------------------------------------------------------------------------------------------------------------------------------------------------------------------------------------------------------------------------------------------------------------------------------------------------------------------------------------------|----------|----------|----------|--|
| 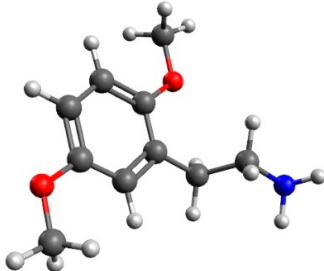                                                                                                                                                                                                                                                                |          |          |          |  |
| O                                                                                                                                                                                                                                                                                                                                                 | 0.00946  | 0.86438  | 14.17955 |  |
| N                                                                                                                                                                                                                                                                                                                                                 | 0.93359  | 3.29309  | 20.77385 |  |
| H                                                                                                                                                                                                                                                                                                                                                 | 1.50936  | 4.09881  | 21.01397 |  |
| H                                                                                                                                                                                                                                                                                                                                                 | -0.01647 | 3.64114  | 20.65732 |  |
| C                                                                                                                                                                                                                                                                                                                                                 | 3.96311  | -0.95116 | 18.82499 |  |
| H                                                                                                                                                                                                                                                                                                                                                 | 4.37325  | -1.00315 | 19.83816 |  |
| H                                                                                                                                                                                                                                                                                                                                                 | 3.70285  | -1.96942 | 18.51822 |  |
| H                                                                                                                                                                                                                                                                                                                                                 | 4.73575  | -0.52587 | 18.17603 |  |
| O                                                                                                                                                                                                                                                                                                                                                 | 2.81119  | -0.11987 | 18.86606 |  |
| C                                                                                                                                                                                                                                                                                                                                                 | 2.14442  | 0.09768  | 17.68995 |  |
| C                                                                                                                                                                                                                                                                                                                                                 | 1.00806  | 0.92483  | 17.77159 |  |
| C                                                                                                                                                                                                                                                                                                                                                 | 0.27055  | 1.21124  | 16.60492 |  |
| H                                                                                                                                                                                                                                                                                                                                                 | -0.59926 | 1.85492  | 16.68905 |  |
| C                                                                                                                                                                                                                                                                                                                                                 | 0.64497  | 0.67168  | 15.37464 |  |
| C                                                                                                                                                                                                                                                                                                                                                 | -1.12406 | 1.72233  | 14.18256 |  |
| H                                                                                                                                                                                                                                                                                                                                                 | -1.51320 | 1.76488  | 13.16061 |  |
| H                                                                                                                                                                                                                                                                                                                                                 | -1.91869 | 1.32755  | 14.82411 |  |
| H                                                                                                                                                                                                                                                                                                                                                 | -0.84600 | 2.73988  | 14.47619 |  |
| C                                                                                                                                                                                                                                                                                                                                                 | 1.40966  | 2.72278  | 19.51195 |  |
| H                                                                                                                                                                                                                                                                                                                                                 | 1.37589  | 3.49665  | 18.73621 |  |
| H                                                                                                                                                                                                                                                                                                                                                 | 2.45903  | 2.43399  | 19.63346 |  |
| C                                                                                                                                                                                                                                                                                                                                                 | 0.56105  | 1.51682  | 19.09377 |  |
| H                                                                                                                                                                                                                                                                                                                                                 | -0.49311 | 1.81580  | 19.01970 |  |
| H                                                                                                                                                                                                                                                                                                                                                 | 0.58945  | 0.73833  | 19.86720 |  |
| C                                                                                                                                                                                                                                                                                                                                                 | 2.51423  | -0.43881 | 16.45528 |  |
| H                                                                                                                                                                                                                                                                                                                                                 | 3.37750  | -1.08608 | 16.34521 |  |
| C                                                                                                                                                                                                                                                                                                                                                 | 1.76616  | -0.15419 | 15.30953 |  |
| H                                                                                                                                                                                                                                                                                                                                                 | 2.06252  | -0.58259 | 14.35502 |  |
| Identified conformers:                                                                                                                                                                                                                                                                                                                            |          |          |          |  |
| <div>  <p>Conf #1</p> </div> <div>  <p>Conf #2</p> </div> <div>  <p>Conf #3</p> </div> |          |          |          |  |

**Table S2.** 25H-NBOH: crystal conformation, xyz coordinates and conformers.

| 25H-NBOH                                                                           |          |          |          |  |
|------------------------------------------------------------------------------------|----------|----------|----------|--|
| 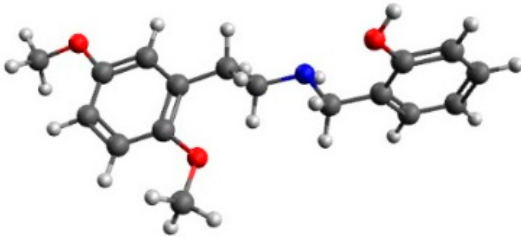 |          |          |          |  |
| O                                                                                  | 17.67503 | 3.67325  | 12.26497 |  |
| O                                                                                  | 20.65958 | 7.52022  | 8.90835  |  |
| H                                                                                  | 21.14324 | 7.73222  | 8.09462  |  |
| N                                                                                  | 20.98553 | 6.49625  | 12.24808 |  |
| H                                                                                  | 21.35615 | 7.11035  | 12.97063 |  |
| C                                                                                  | 20.64204 | 8.62789  | 9.70874  |  |
| C                                                                                  | 18.04025 | 1.51024  | 13.35766 |  |
| H                                                                                  | 16.98625 | 1.33727  | 13.54829 |  |
| C                                                                                  | 20.23112 | 8.50143  | 11.04087 |  |
| C                                                                                  | 18.94995 | 0.54270  | 13.80320 |  |
| H                                                                                  | 18.55462 | -0.33502 | 14.30293 |  |
| C                                                                                  | 20.76640 | 1.86168  | 12.94147 |  |
| H                                                                                  | 21.83532 | 1.99513  | 12.78583 |  |
| C                                                                                  | 20.58716 | 10.89331 | 11.32653 |  |
| H                                                                                  | 20.56402 | 11.77661 | 11.95945 |  |
| C                                                                                  | 18.48743 | 2.66189  | 12.70552 |  |
| C                                                                                  | 19.83598 | 7.16699  | 11.62792 |  |
| H                                                                                  | 19.04967 | 7.33468  | 12.37612 |  |
| H                                                                                  | 19.38200 | 6.54912  | 10.84616 |  |
| C                                                                                  | 16.27535 | 3.42673  | 12.25166 |  |
| H                                                                                  | 15.79092 | 4.28119  | 11.76910 |  |
| H                                                                                  | 16.03303 | 2.53321  | 11.66660 |  |
| H                                                                                  | 15.88127 | 3.35306  | 13.27020 |  |
| C                                                                                  | 21.01861 | 9.86529  | 9.18501  |  |
| H                                                                                  | 21.32891 | 9.96362  | 8.14965  |  |
| C                                                                                  | 20.40152 | 4.09271  | 11.82811 |  |
| H                                                                                  | 21.35680 | 3.87055  | 11.33446 |  |
| H                                                                                  | 19.72138 | 4.38672  | 11.02099 |  |
| C                                                                                  | 19.86559 | 2.84167  | 12.49203 |  |
| O                                                                                  | 21.30388 | -0.14222 | 13.99808 |  |
| C                                                                                  | 20.59536 | 5.21903  | 12.85478 |  |
| H                                                                                  | 19.70482 | 5.35124  | 13.48198 |  |
| H                                                                                  | 21.39951 | 4.91943  | 13.53933 |  |
| C                                                                                  | 20.98810 | 10.99908 | 9.99631  |  |
| H                                                                                  | 21.27635 | 11.96526 | 9.59102  |  |
| C                                                                                  | 20.31726 | 0.71806  | 13.60333 |  |
| C                                                                                  | 20.91715 | -1.20632 | 14.85824 |  |
| H                                                                                  | 21.82353 | -1.74331 | 15.15392 |  |
| H                                                                                  | 20.44289 | -0.82710 | 15.76989 |  |
| H                                                                                  | 20.26450 | -1.91491 | 14.33828 |  |

|                                                                                       |   |          |         |          |
|---------------------------------------------------------------------------------------|---|----------|---------|----------|
|                                                                                       | C | 20.21552 | 9.65216 | 11.84737 |
|                                                                                       | H | 19.90832 | 9.58428 | 12.88851 |
| Identified conformers                                                                 |   |          |         |          |
| 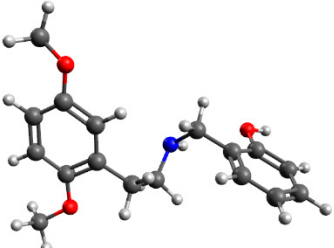     |   |          |         |          |
| Conf #1                                                                               |   |          |         |          |
|      |   |          |         |          |
| Conf #2                                                                               |   |          |         |          |
|    |   |          |         |          |
| Conf #3                                                                               |   |          |         |          |
|      |   |          |         |          |
| Conf #4                                                                               |   |          |         |          |
|      |   |          |         |          |
| Conf #5                                                                               |   |          |         |          |
|    |   |          |         |          |
| Conf #6                                                                               |   |          |         |          |
|    |   |          |         |          |
| Conf #7                                                                               |   |          |         |          |
|    |   |          |         |          |
| Conf #8                                                                               |   |          |         |          |
|  |   |          |         |          |
| Conf #9                                                                               |   |          |         |          |
|    |   |          |         |          |
| Conf #10                                                                              |   |          |         |          |
|    |   |          |         |          |
| Conf #11                                                                              |   |          |         |          |
|  |   |          |         |          |
| Conf #12                                                                              |   |          |         |          |

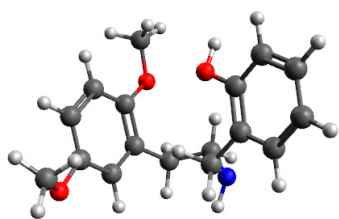

Conf #13

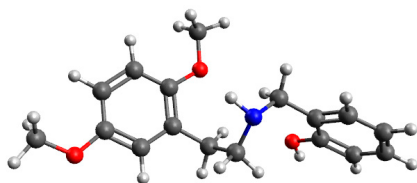

Conf #14

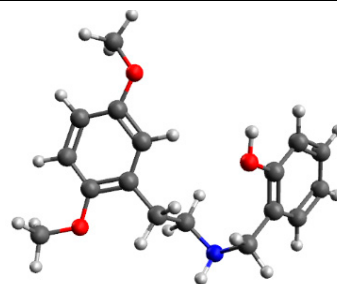

Conf #15

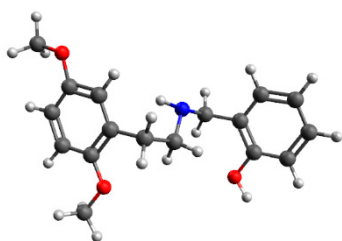

Conf #16

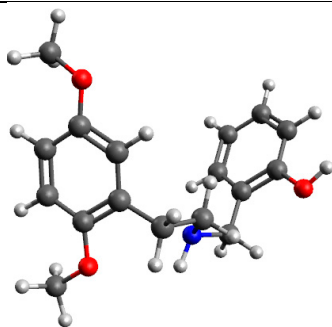

Conf #17

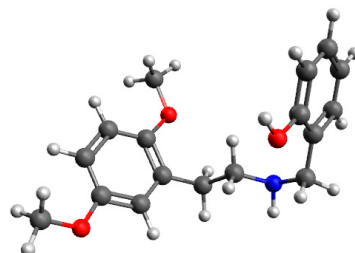

Conf #18

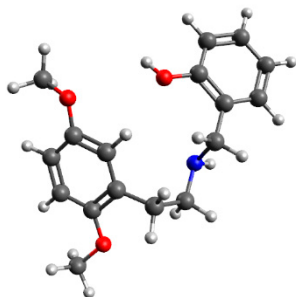

Conf #19

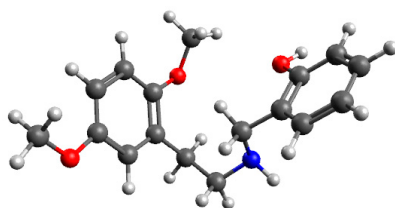

Conf #20

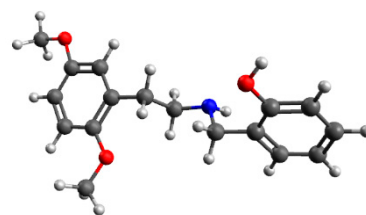

Conf #21

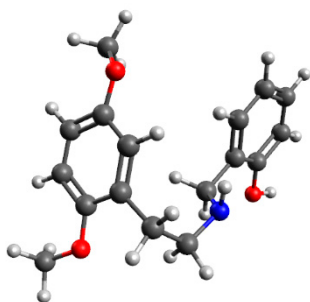

Conf #22

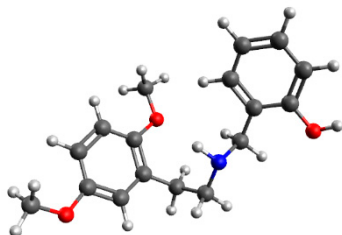

Conf #23

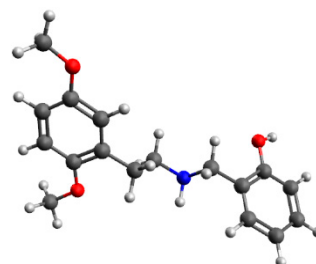

Conf #24

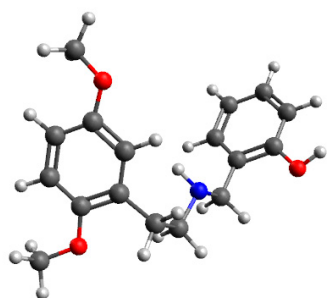

Conf #25

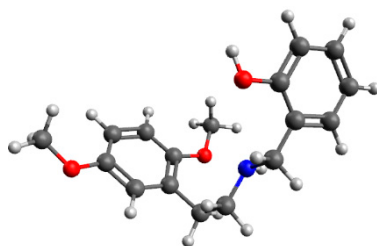

Conf #26

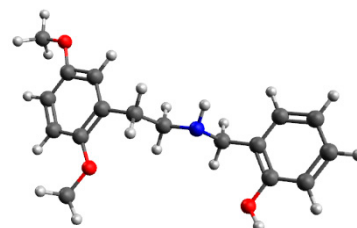

Conf #27

**Table S3.** 25I-NBOMe: crystal conformation, xyz coordinates and conformers.

| 25I-NBOMe                                                                          |          |         |          |  |
|------------------------------------------------------------------------------------|----------|---------|----------|--|
| 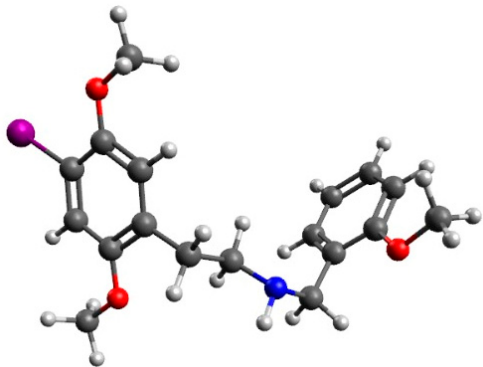 |          |         |          |  |
| I                                                                                  | 13.89360 | 3.10027 | 1.64997  |  |
| O                                                                                  | 8.53452  | 2.44965 | 2.46301  |  |
| O                                                                                  | 12.99217 | 5.67512 | 3.30566  |  |
| N                                                                                  | 6.67026  | 4.39774 | 5.91045  |  |
| H                                                                                  | 5.91509  | 4.26693 | 5.23957  |  |
| O                                                                                  | 6.12445  | 5.72845 | 8.90341  |  |
| C                                                                                  | 7.18981  | 4.89669 | 9.13039  |  |
| C                                                                                  | 7.31725  | 3.79874 | 8.25879  |  |
| C                                                                                  | 10.60153 | 5.24030 | 3.58967  |  |
| H                                                                                  | 10.43811 | 6.14529 | 4.16774  |  |
| C                                                                                  | 6.36657  | 3.58793 | 7.09925  |  |
| H                                                                                  | 5.34802  | 3.82449 | 7.43089  |  |
| H                                                                                  | 6.33186  | 2.52402 | 6.82932  |  |
| C                                                                                  | 9.49472  | 4.40027 | 3.35694  |  |
| C                                                                                  | 12.02328 | 3.71582 | 2.39438  |  |
| C                                                                                  | 11.87252 | 4.91132 | 3.11108  |  |
| C                                                                                  | 8.15526  | 4.76791 | 3.96517  |  |
| H                                                                                  | 7.34957  | 4.54956 | 3.25290  |  |
| H                                                                                  | 8.11297  | 5.85153 | 4.13720  |  |
| C                                                                                  | 9.66261  | 3.20849 | 2.63096  |  |
| C                                                                                  | 10.92953 | 2.87235 | 2.15254  |  |
| H                                                                                  | 11.09048 | 1.95490 | 1.59722  |  |
| C                                                                                  | 8.11065  | 5.06041 | 10.17223 |  |
| H                                                                                  | 8.03742  | 5.88592 | 10.87197 |  |
| C                                                                                  | 7.93935  | 4.01539 | 5.28550  |  |
| H                                                                                  | 7.95628  | 2.93430 | 5.10152  |  |
| H                                                                                  | 8.77320  | 4.25184 | 5.95667  |  |
| C                                                                                  | 8.37274  | 2.88732 | 8.45389  |  |
| H                                                                                  | 8.49076  | 2.03861 | 7.78360  |  |
| C                                                                                  | 9.15607  | 4.15003 | 10.34789 |  |
| H                                                                                  | 9.86639  | 4.29016 | 11.15842 |  |
| C                                                                                  | 9.28727  | 3.06354 | 9.49008  |  |
| H                                                                                  | 10.10104 | 2.35604 | 9.62468  |  |
| C                                                                                  | 8.65948  | 1.23441 | 1.73595  |  |
| H                                                                                  | 8.99898  | 1.41803 | 0.71142  |  |
| H                                                                                  | 7.66712  | 0.77661 | 1.67958  |  |
| H                                                                                  | 9.32085  | 0.53312 | 2.25502  |  |
| C                                                                                  | 12.84329 | 6.90610 | 4.00081  |  |

|   |          |         |          |
|---|----------|---------|----------|
| H | 12.16352 | 7.58065 | 3.46986  |
| H | 13.82498 | 7.38794 | 4.04023  |
| H | 12.51364 | 6.73968 | 5.03158  |
| C | 6.11513  | 6.97414 | 9.58606  |
| H | 5.28190  | 7.56413 | 9.19228  |
| H | 7.03648  | 7.53774 | 9.40458  |
| H | 5.94272  | 6.83037 | 10.65745 |

Identified conformers

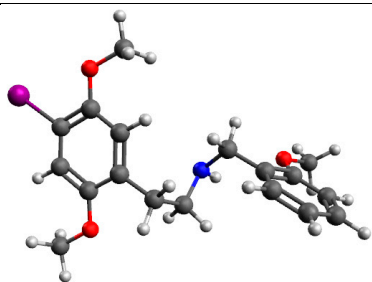

Conf #1

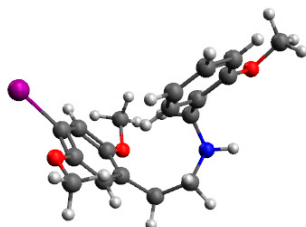

Conf #2

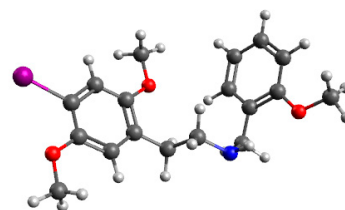

Conf #3

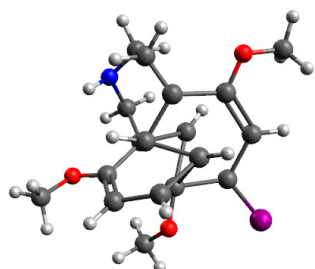

Conf #4

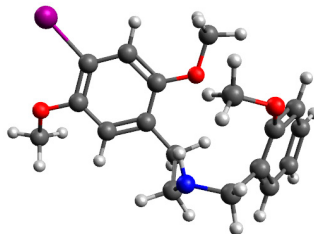

Conf #5

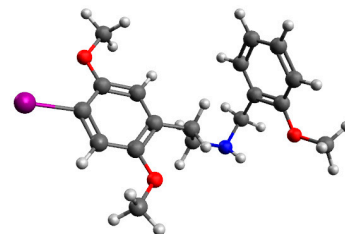

Conf #6

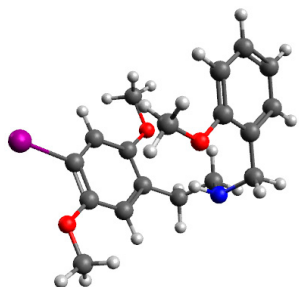

Conf #7

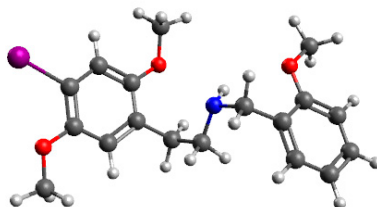

Conf #8

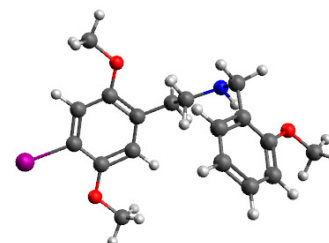

Conf #9

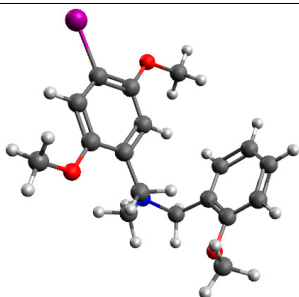

Conf #10

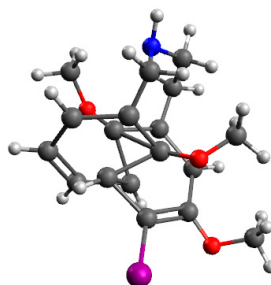

Conf #11

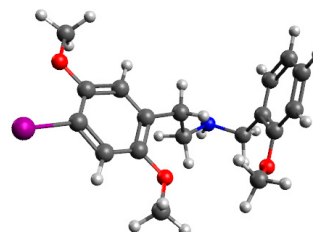

Conf #12



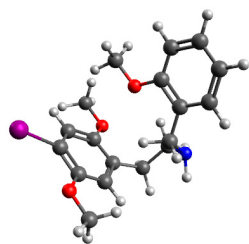

Conf #13

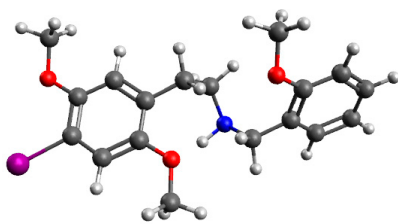

Conf #14

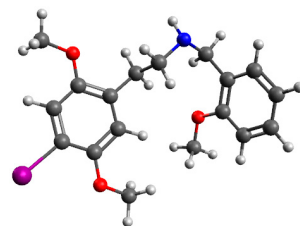

Conf #15

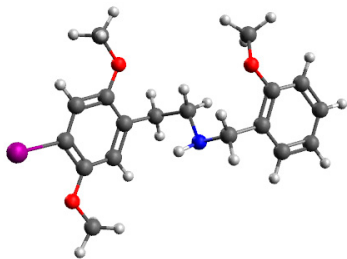

Conf #16

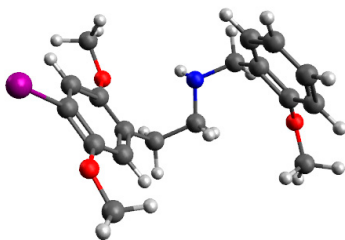

Conf #17

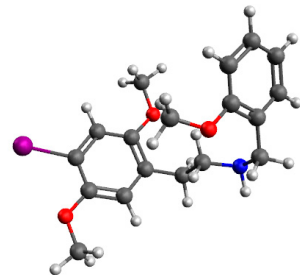

Conf #18

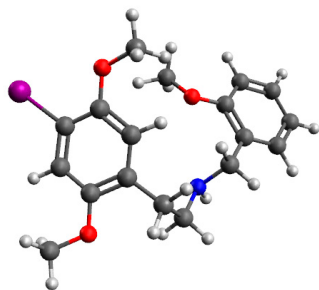

Conf #19

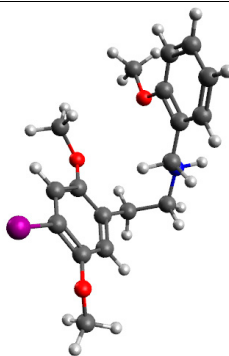

Conf #20

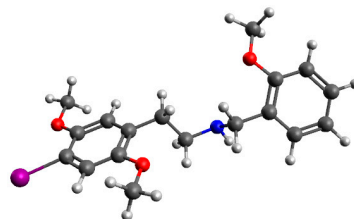

Conf #21

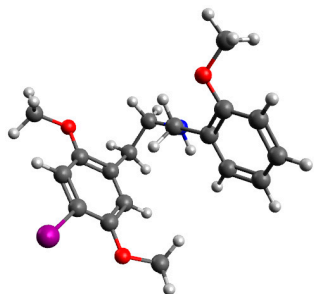

Conf #22

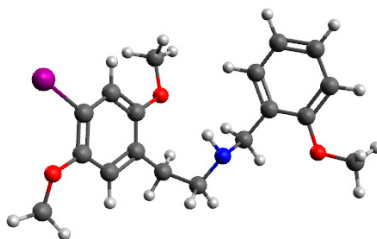

Conf #23

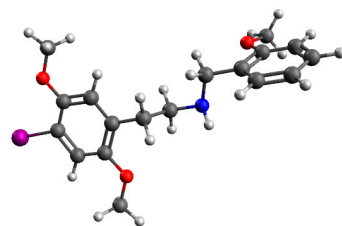

Conf #24

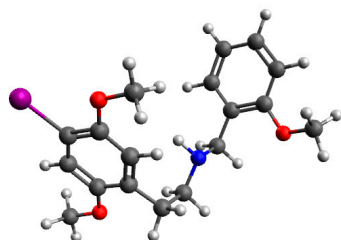

Conf #25

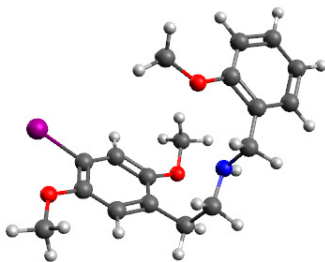

Conf #26

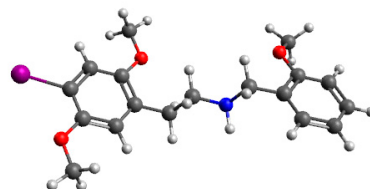

Conf #27
